# Supplementary material for: Production of Polyunsaturated Fatty Acids and Lipids from Autotrophic, Mixotrophic and Heterotrophic cultivation of Galdieria sp. strain USBA-GBX-832
Source: PubMed Central journal article supplement (PMC6658668; doi:10.1038/s41598-019-46645-3), 2019-07-25
Supplement: 41598_2019_46645_MOESM1_ESM.pdf [file 41598_2019_46645_MOESM1_ESM.pdf]

## SUPPLEMENTARY MATERIAL

### **Production of Polyunsaturated Fatty Acids and Lipids from Autotrophic, Mixotrophic and Heterotrophic cultivation of *Galdieria* sp. strain USBA-GBX-832**

López Gina<sup>1</sup>, Yate Camilo<sup>2</sup>, Ramos Freddy A.<sup>3</sup>, Cala Mónica P.<sup>4</sup>, Restrepo Silvia<sup>5</sup>, Baena Sandra<sup>1</sup>

<sup>1</sup> Unidad de Saneamiento y Biotecnología Ambiental (USBA), Departamento de Biología, Pontificia Universidad Javeriana, POB 56710, Bogotá DC, Colombia.

<sup>2</sup>Facultad de estadística, Universidad Santo Tomas, Carrera 9 # 51-11, Bogotá DC, Colombia.

<sup>3</sup>Departamento de Química, Universidad Nacional de Colombia-Sede Bogotá, Carrera 30 # 45-03, Bogotá DC, Colombia.

<sup>4</sup>Department of Chemistry, Universidad de los Andes, Cra 1 No. 18A-12, Bogotá DC, Colombia.

<sup>5</sup>Biological Sciences Department, Universidad de los Andes, Cra 1 No. 18A-12, Bogotá DC, Colombia.

***Corresponding author:*** Sandra Baena. Pontificia Universidad Javeriana, POB 56710, Bogotá DC, Colombia. Tel: + 57-1-320 83 20. Ext 4170; E-mail: [baena@javeriana.edu.co](mailto:baena@javeriana.edu.co)

***Present/permanent address:*** Unidad de Saneamiento y Biotecnología Ambiental, Departamento de Biología, Pontificia Universidad Javeriana, POB 56710, Bogotá DC, Colombia.

**Table S1.** Analysis of variance (ANOVA) to compare the mean values obtained when *Galdieria* sp. USBA-GBX-832 was growing at different temperatures under heterotrophic conditions. SS: Sum of squares, df: Degrees of freedom; \*Significance at  $p < 0.05$ .

| Source               | Dependent variable               | Sum of square           | df | Mean square | F        | P value |
|----------------------|----------------------------------|-------------------------|----|-------------|----------|---------|
| <b>Model</b>         | <b>Biomass Productivity</b>      | 855505,228 <sup>a</sup> | 18 | 47528,068   | 523,493  | ,000    |
|                      | <b>Lipid productivity</b>        | 832,804 <sup>b</sup>    | 18 | 46,267      | 221,491  | ,000    |
|                      | <b>%Lipids</b>                   | 825,174 <sup>c</sup>    | 18 | 45,843      | 419,791  | ,000    |
|                      | <b>%<math>\Sigma</math> PUFA</b> | 50246,217 <sup>d</sup>  | 18 | 2791,456    | 3336,328 | ,000    |
| <b>Temperature</b>   | <b>Biomass Productivity</b>      | 97024,080               | 1  | 97024,080   | 1068,662 | ,000    |
|                      | <b>Lipid productivity</b>        | 1,270                   | 1  | 1,270       | 6,080    | ,019    |
|                      | <b>%Lipids</b>                   | 68,394                  | 1  | 68,394      | 626,293  | ,000    |
|                      | <b>%<math>\Sigma</math> PUFA</b> | 2568,181                | 1  | 2568,181    | 3069,471 | ,000    |
| <b>Substrate</b>     | <b>Biomass Productivity</b>      | 42398,940               | 8  | 5299,867    | 58,375   | ,000    |
|                      | <b>Lipid productivity</b>        | 62,295                  | 8  | 7,787       | 37,278   | ,000    |
|                      | <b>%Lipids</b>                   | 40,010                  | 8  | 5,001       | 45,797   | ,000    |
|                      | <b>%<math>\Sigma</math> PUFA</b> | 189,491                 | 8  | 23,686      | 28,310   | ,000    |
| <b>Temperature *</b> | <b>Biomass Productivity</b>      | 17157,100               | 8  | 2144,637    | 23,622   | ,000    |
| <b>Substrate</b>     | <b>Lipid productivity</b>        | 46,217                  | 8  | 5,777       | 27,656   | ,000    |
|                      | <b>%Lipids</b>                   | 36,495                  | 8  | 4,562       | 41,774   | ,000    |
|                      | <b>%<math>\Sigma</math> PUFA</b> | 268,212                 | 8  | 33,526      | 40,071   | ,000    |
| <b>Error</b>         | <b>Biomass Productivity</b>      | 3268,448                | 36 | 90,790      |          |         |
|                      | <b>Lipid productivity</b>        | 7,520                   | 36 | ,209        |          |         |
|                      | <b>%Lipids</b>                   | 3,931                   | 36 | ,109        |          |         |
|                      | <b>%<math>\Sigma</math> PUFA</b> | 30,121                  | 36 | ,837        |          |         |
| <b>Total</b>         | <b>Biomass Productivity</b>      | 858773,676              | 54 |             |          |         |
|                      | <b>Lipid productivity</b>        | 840,324                 | 54 |             |          |         |
|                      | <b>%Lipids</b>                   | 829,105                 | 54 |             |          |         |
|                      | <b>%<math>\Sigma</math> PUFA</b> | 50276,337               | 54 |             |          |         |

a.  $R^2 = ,996$  (Adj R-Squared = ,994)

b.  $R^2 = ,991$  (Adj R-Squared = ,987)

c.  $R^2 = ,995$  (Adj R-Squared = ,993)

d.  $R^2 = ,999$  (Adj R-Squared = ,999)

**Table S2.** Experimental design used to evaluate other culture variables that favored higher levels of biomass production and lipid accumulation

| Test | pH  | Galactose (mM) | Yeast extract (g.L <sup>-1</sup> ) | (NH <sub>4</sub> ) <sub>2</sub> SO <sub>4</sub> (g.L <sup>-1</sup> ) | Temperature (°C) |
|------|-----|----------------|------------------------------------|----------------------------------------------------------------------|------------------|
| 1    | 2.5 | 2.5            | 0.5                                | 0.13                                                                 | 25               |
| 2    | 2.5 | 2.5            | 0                                  | 1.3                                                                  | 25               |
| 3    | 2.5 | 25             | 0                                  | 0.13                                                                 | 25               |
| 4    | 2.5 | 25             | 0.5                                | 1.3                                                                  | 25               |
| 5    | 1.5 | 25             | 0                                  | 1.3                                                                  | 25               |
| 6    | 1.5 | 25             | 0.5                                | 0.13                                                                 | 25               |
| 7    | 1.5 | 2.5            | 0.5                                | 1.3                                                                  | 25               |
| 8    | 1.5 | 2.5            | 0                                  | 0.13                                                                 | 25               |
| 9    | 1.5 | 25             | 0.5                                | 1.3                                                                  | 25               |
| 10   | 1.5 | 25             | 0                                  | 0.13                                                                 | 25               |
| 11   | 1.5 | 2.5            | 0                                  | 1.3                                                                  | 25               |
| 12   | 1.5 | 2.5            | 0.5                                | 0.13                                                                 | 25               |
| 13   | 2.5 | 25             | 0                                  | 1.3                                                                  | 25               |
| 14   | 2.5 | 25             | 0.5                                | 0.13                                                                 | 25               |
| 15   | 2.5 | 2.5            | 0.5                                | 1.3                                                                  | 25               |
| 16   | 2.5 | 2.5            | 0                                  | 0.13                                                                 | 25               |
| 17   | 2.5 | 2.5            | 0.5                                | 0.13                                                                 | 45               |
| 18   | 2.5 | 2.5            | 0                                  | 1.3                                                                  | 45               |
| 19   | 2.5 | 25             | 0                                  | 0.13                                                                 | 45               |
| 20   | 2.5 | 25             | 0.5                                | 1.3                                                                  | 45               |
| 21   | 1.5 | 25             | 0                                  | 1.3                                                                  | 45               |
| 22   | 1.5 | 25             | 0.5                                | 0.13                                                                 | 45               |
| 23   | 1.5 | 2.5            | 0.5                                | 1.3                                                                  | 45               |
| 24   | 1.5 | 2.5            | 0                                  | 0.13                                                                 | 45               |
| 25   | 1.5 | 25             | 0.5                                | 1.3                                                                  | 45               |
| 26   | 1.5 | 25             | 0                                  | 0.13                                                                 | 45               |
| 27   | 1.5 | 2.5            | 0                                  | 1.3                                                                  | 45               |
| 28   | 1.5 | 2.5            | 0.5                                | 0.13                                                                 | 45               |
| 29   | 2.5 | 25             | 0                                  | 1.3                                                                  | 45               |
| 30   | 2.5 | 25             | 0.5                                | 0.13                                                                 | 45               |
| 31   | 2.5 | 2.5            | 0.5                                | 1.3                                                                  | 45               |
| 32   | 2.5 | 2.5            | 0                                  | 0.13                                                                 | 45               |

**Table S3a.** Analysis of variance (ANOVA) of the multifactorial experimental design over biomass productivity of *Galdieria* sp. USBA-GBX-832

| Response                                                       | 1 Biomass productivity |           |                       |         |                  |                    |
|----------------------------------------------------------------|------------------------|-----------|-----------------------|---------|------------------|--------------------|
| Transform:                                                     | Natural Log            | Constant: | 0                     |         |                  |                    |
| Analysis of variance table [Partial sum of squares - Type III] |                        |           |                       |         |                  |                    |
| Source                                                         | Sum of Squares         | df        | Mean Square           | F Value | p-value Prob > F |                    |
| Model                                                          | 59.10                  | 31        | 1.91                  | 576.10  | < 0.0001         | <b>SIGNIFICANT</b> |
| A-Temperature                                                  | 10.88                  | 1         | 10.88                 | 3288.17 | < 0.0001         |                    |
| B-pH                                                           | 0.12                   | 1         | 0.12                  | 35.09   | < 0.0001         |                    |
| C-[Gal]                                                        | 23.83                  | 1         | 23.83                 | 7201.78 | < 0.0001         |                    |
| D-Y.E                                                          | 2.93                   | 1         | 2.93                  | 886.23  | < 0.0001         |                    |
| E-(NH <sub>4</sub> ) <sub>2</sub> SO <sub>4</sub>              | 0.32                   | 1         | 0.32                  | 95.79   | < 0.0001         |                    |
| AB                                                             | 0.36                   | 1         | 0.36                  | 109.04  | < 0.0001         |                    |
| AC                                                             | 1.19                   | 1         | 1.19                  | 358.59  | < 0.0001         |                    |
| AD                                                             | 0.02                   | 1         | 0.02                  | 7.26    | 0.0111           |                    |
| AE                                                             | 0.11                   | 1         | 0.11                  | 33.76   | < 0.0001         |                    |
| BC                                                             | 0.43                   | 1         | 0.43                  | 128.44  | < 0.0001         |                    |
| BD                                                             | 0.12                   | 1         | 0.12                  | 37.68   | < 0.0001         |                    |
| BE                                                             | 0.22                   | 1         | 0.22                  | 65.07   | < 0.0001         |                    |
| CD                                                             | 0.85                   | 1         | 0.85                  | 257.88  | < 0.0001         |                    |
| CE                                                             | 0.87                   | 1         | 0.87                  | 264.41  | < 0.0001         |                    |
| DE                                                             | 0.01                   | 1         | 0.01                  | 3.95    | 0.0555           |                    |
| ABC                                                            | 0.77                   | 1         | 0.77                  | 232.44  | < 0.0001         |                    |
| ABD                                                            | 0.22                   | 1         | 0.22                  | 67.59   | < 0.0001         |                    |
| ABE                                                            | 0.00                   | 1         | 0.00                  | 1.01    | 0.3225           |                    |
| ACD                                                            | 0.62                   | 1         | 0.62                  | 186.68  | < 0.0001         |                    |
| ACE                                                            | 1.20                   | 1         | 1.20                  | 362.70  | < 0.0001         |                    |
| ADE                                                            | 0.01                   | 1         | 0.01                  | 4.24    | 0.0477           |                    |
| BCD                                                            | 1.32                   | 1         | 1.32                  | 399.48  | < 0.0001         |                    |
| BCE                                                            | 0.59                   | 1         | 0.59                  | 178.20  | < 0.0001         |                    |
| BDE                                                            | 0.45                   | 1         | 0.45                  | 135.28  | < 0.0001         |                    |
| CDE                                                            | 0.92                   | 1         | 0.92                  | 277.55  | < 0.0001         |                    |
| ABCD                                                           | 0.53                   | 1         | 0.53                  | 160.94  | < 0.0001         |                    |
| ABCE                                                           | 1.10                   | 1         | 1.10                  | 332.68  | < 0.0001         |                    |
| ABDE                                                           | 1.14                   | 1         | 1.14                  | 345.45  | < 0.0001         |                    |
| ACDE                                                           | 2.82                   | 1         | 2.82                  | 853.23  | < 0.0001         |                    |
| BCDE                                                           | 0.30                   | 1         | 0.30                  | 90.06   | < 0.0001         |                    |
| ABCDE                                                          | 4.83                   | 1         | 4.83                  | 1458.36 | < 0.0001         |                    |
| Std. Dev.                                                      | 0.057                  |           | <b>R-Squared</b>      | 0.99    |                  |                    |
| Mean                                                           | 3.55                   |           | <b>Adj R-Squared</b>  | 0.99    |                  |                    |
| C.V. %                                                         | 1.62                   |           | <b>Pred R-Squared</b> | 0.99    |                  |                    |

**Table S3b.** Analysis of variance (ANOVA) of the multifactorial experimental design used to evaluate various culture factors over **lipid productivity** of *Galdieria* sp. USBA-GBX-832

| Response                                                       | 1              |           | Lipid productivity   |         |                  |                    |
|----------------------------------------------------------------|----------------|-----------|----------------------|---------|------------------|--------------------|
| Transform:                                                     | Natural Log    | Constant: | 0                    |         |                  |                    |
| Analysis of variance table [Partial sum of squares - Type III] |                |           |                      |         |                  |                    |
| Source                                                         | Sum of Squares | df        | Mean Square          | F Value | p-value Prob > F |                    |
| Model                                                          | 54.87          | 31        | 1.77                 | 71.24   | < 0.0001         | <b>SIGNIFICANT</b> |
| A-Temperature                                                  | 13.82          | 1         | 13.82                | 556.11  | < 0.0001         |                    |
| B-pH                                                           | 0.01           | 1         | 0.01                 | 0.47    | 0.4981           |                    |
| C-[Gal]                                                        | 30.11          | 1         | 30.11                | 1211.80 | < 0.0001         |                    |
| D-Y.E                                                          | 1.67           | 1         | 1.67                 | 67.07   | < 0.0001         |                    |
| E-(NH <sub>4</sub> ) <sub>2</sub> SO <sub>4</sub>              | 0.52           | 1         | 0.52                 | 21.05   | < 0.0001         |                    |
| AB                                                             | 0.40           | 1         | 0.40                 | 16.28   | 0.0003           |                    |
| AC                                                             | 4.46           | 1         | 4.46                 | 179.38  | < 0.0001         |                    |
| AD                                                             | 0.00           | 1         | 0.00                 | 0.00    | 0.9729           |                    |
| AE                                                             | 0.06           | 1         | 0.06                 | 2.42    | 0.1294           |                    |
| BC                                                             | 0.07           | 1         | 0.07                 | 2.69    | 0.1105           |                    |
| BD                                                             | 0.19           | 1         | 0.19                 | 7.50    | 0.0100           |                    |
| BE                                                             | 0.23           | 1         | 0.23                 | 9.39    | 0.0044           |                    |
| CD                                                             | 0.03           | 1         | 0.03                 | 1.09    | 0.3053           |                    |
| CE                                                             | 0.06           | 1         | 0.06                 | 2.26    | 0.1426           |                    |
| DE                                                             | 0.00           | 1         | 0.00                 | 0.11    | 0.7410           |                    |
| ABC                                                            | 0.25           | 1         | 0.25                 | 10.00   | 0.0034           |                    |
| ABD                                                            | 0.11           | 1         | 0.11                 | 4.23    | 0.0479           |                    |
| ABE                                                            | 0.08           | 1         | 0.08                 | 3.06    | 0.0899           |                    |
| ACD                                                            | 0.09           | 1         | 0.09                 | 3.75    | 0.0618           |                    |
| ACE                                                            | 0.01           | 1         | 0.01                 | 0.22    | 0.6389           |                    |
| ADE                                                            | 0.03           | 1         | 0.03                 | 1.12    | 0.2982           |                    |
| BCD                                                            | 0.65           | 1         | 0.65                 | 26.14   | < 0.0001         |                    |
| BCE                                                            | 0.04           | 1         | 0.04                 | 1.57    | 0.2199           |                    |
| BDE                                                            | 0.02           | 1         | 0.02                 | 0.95    | 0.3368           |                    |
| CDE                                                            | 0.20           | 1         | 0.20                 | 8.07    | 0.0078           |                    |
| ABCD                                                           | 0.07           | 1         | 0.07                 | 2.84    | 0.1019           |                    |
| ABCE                                                           | 0.07           | 1         | 0.07                 | 2.80    | 0.1041           |                    |
| ABDE                                                           | 0.05           | 1         | 0.05                 | 1.99    | 0.1681           |                    |
| ACDE                                                           | 0.51           | 1         | 0.51                 | 20.46   | < 0.0001         |                    |
| BCDE                                                           | 0.25           | 1         | 0.25                 | 10.25   | 0.0031           |                    |
| ABCDE                                                          | 0.83           | 1         | 0.83                 | 33.36   | < 0.0001         |                    |
| Std. Dev.                                                      | 0.16           |           | <b>R-Squared</b>     | 0.99    |                  |                    |
| Mean                                                           | 0.61           |           | <b>Adj R-Squared</b> | 0.97    |                  |                    |

C.V. % 25.77 Pred R-Squared 0.94  
**Table S3c.** Analysis of variance (ANOVA) of multifactorial experimental design used to evaluate various culture factors over % PUFA of *Galdieria* sp. USBA-GBX-832

| Response                                                       |                | 3 %PUFA   |                      |         |                  |                    |  |
|----------------------------------------------------------------|----------------|-----------|----------------------|---------|------------------|--------------------|--|
| Transform:                                                     | Natural Log    | Constant: |                      |         | 0                |                    |  |
| Analysis of variance table [Partial sum of squares - Type III] |                |           |                      |         |                  |                    |  |
| Source                                                         | Sum of Squares | df        | Mean Square          | F Value | p-value Prob > F |                    |  |
| Model                                                          | 20.27          | 31        | 0.65                 | 67.00   | < 0.0001         | <b>SIGNIFICANT</b> |  |
| A-Temperature                                                  | 0.51           | 1         | 0.51                 | 52.56   | < 0.0001         |                    |  |
| B-pH                                                           | 3.55           | 1         | 3.55                 | 364.13  | < 0.0001         |                    |  |
| C-[Gal]                                                        | 0.23           | 1         | 0.23                 | 23.88   | < 0.0001         |                    |  |
| D-Y.E                                                          | 0.13           | 1         | 0.13                 | 13.27   | 0.0009           |                    |  |
| E-(NH <sub>4</sub> ) <sub>2</sub> SO <sub>4</sub>              | 1.03           | 1         | 1.03                 | 105.40  | < 0.0001         |                    |  |
| AB                                                             | 0.06           | 1         | 0.06                 | 5.75    | 0.0225           |                    |  |
| AC                                                             | 1.84           | 1         | 1.84                 | 188.98  | < 0.0001         |                    |  |
| AD                                                             | 0.53           | 1         | 0.53                 | 54.70   | < 0.0001         |                    |  |
| AE                                                             | 0.09           | 1         | 0.09                 | 8.96    | 0.0053           |                    |  |
| BC                                                             | 0.02           | 1         | 0.02                 | 2.55    | 0.1203           |                    |  |
| BD                                                             | 0.04           | 1         | 0.04                 | 4.40    | 0.0440           |                    |  |
| BE                                                             | 1.14           | 1         | 1.14                 | 117.11  | < 0.0001         |                    |  |
| CD                                                             | 0.86           | 1         | 0.86                 | 88.02   | < 0.0001         |                    |  |
| CE                                                             | 0.07           | 1         | 0.07                 | 7.44    | 0.0103           |                    |  |
| DE                                                             | 0.01           | 1         | 0.01                 | 0.58    | 0.4523           |                    |  |
| ABC                                                            | 1.70           | 1         | 1.70                 | 174.22  | < 0.0001         |                    |  |
| ABD                                                            | 0.45           | 1         | 0.45                 | 46.19   | < 0.0001         |                    |  |
| ABE                                                            | 0.79           | 1         | 0.79                 | 81.43   | < 0.0001         |                    |  |
| ACD                                                            | 0.74           | 1         | 0.74                 | 75.71   | < 0.0001         |                    |  |
| ACE                                                            | 0.53           | 1         | 0.53                 | 53.92   | < 0.0001         |                    |  |
| ADE                                                            | 1.54           | 1         | 1.54                 | 157.47  | < 0.0001         |                    |  |
| BCD                                                            | 0.80           | 1         | 0.80                 | 81.97   | < 0.0001         |                    |  |
| BCE                                                            | 0.12           | 1         | 0.12                 | 12.45   | 0.0013           |                    |  |
| BDE                                                            | 0.00           | 1         | 0.00                 | 0.41    | 0.5284           |                    |  |
| CDE                                                            | 1.27           | 1         | 1.27                 | 130.03  | < 0.0001         |                    |  |
| ABCD                                                           | 0.12           | 1         | 0.12                 | 11.87   | 0.0016           |                    |  |
| ABCE                                                           | 0.59           | 1         | 0.59                 | 59.97   | < 0.0001         |                    |  |
| ABDE                                                           | 0.72           | 1         | 0.72                 | 73.72   | < 0.0001         |                    |  |
| ACDE                                                           | 0.05           | 1         | 0.05                 | 4.87    | 0.0346           |                    |  |
| BCDE                                                           | 0.72           | 1         | 0.72                 | 73.81   | < 0.0001         |                    |  |
| ABCDE                                                          | 0.01           | 1         | 0.01                 | 1.30    | 0.2632           |                    |  |
| Std. Dev.                                                      | 0.10           |           | <b>R-Squared</b>     | 0.98    |                  |                    |  |
| Mean                                                           | 3.26           |           | <b>Adj R-Squared</b> | 0.97    |                  |                    |  |

**C.V. %**

3.03

**Pred R-Squared**

0.94

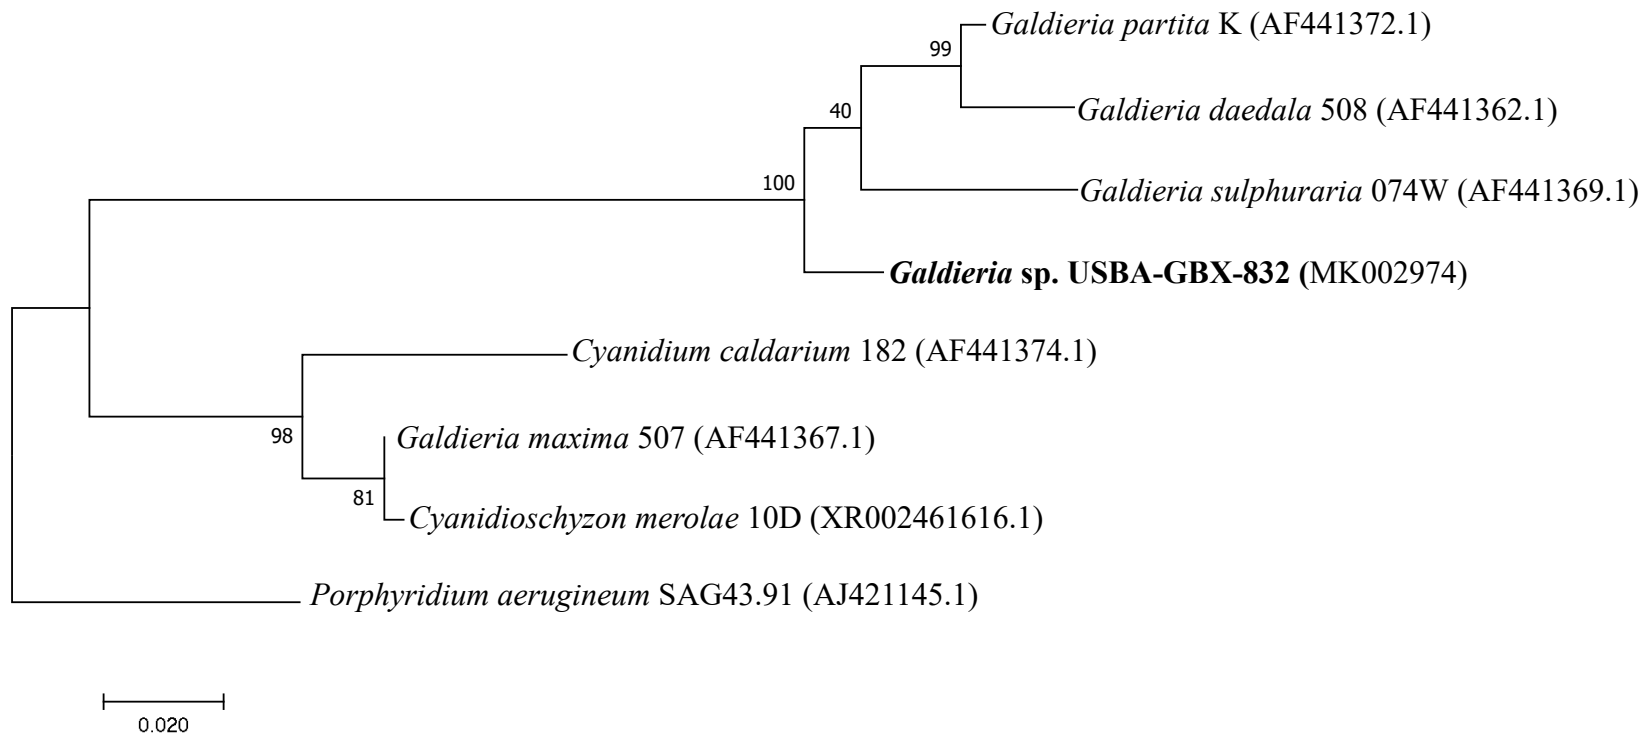

**Figure S1.** Phylogenetic tree of *Galdieria* sp. USBA-GBX-832 inferred from alignment of 18S rRNA gene and recognized type species of Family Cyanodiaceae. The tree was reconstructed by using the Maximum Likelihood method based on the Tamura-Nei model. Numbers represent percentages from 1000 replicate bootstrap sampling. Bar, 0.02 substitutions per nucleotide position. The microalgae *Porphyridium aerugineum* SAG43.91 (AJ421145.1) was used as outgroup.



Design-Expert® Software  
Factor Coding: Actual  
Original Scale  
Biomass productivity  
230.26  
6.24  
X1 = A: Temperature  
X2 = C: [Gal]  
Actual Factors  
B: pH = 2.00  
D: Y.E = 0.25  
E: NH4 = 0.72

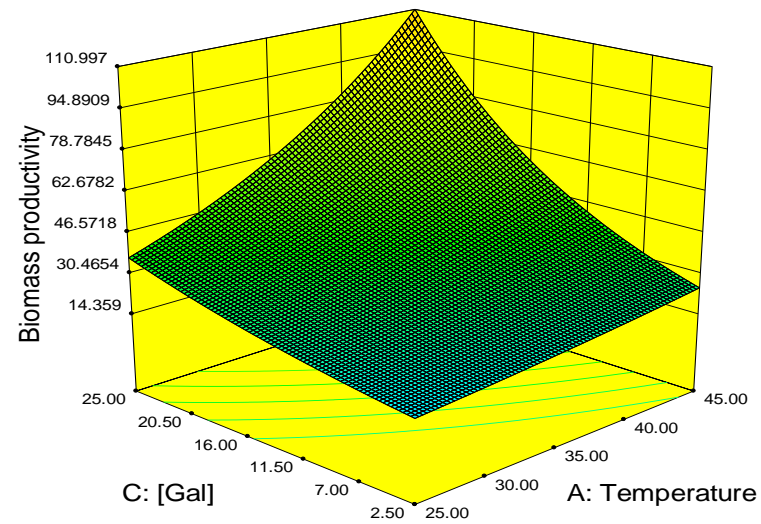

**Figure S2a.** Response surface curve showing the effect of carbon concentration and temperature over biomass productivity of *Galdieria* sp. USBA-GBX-832

Design-Expert® Software  
Factor Coding: Actual  
Original Scale

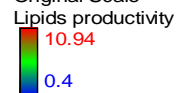

X1 = A: Temperature  
X2 = C: [Gal]

Actual Factors  
B: pH = 2.00  
D: Y.E = 0.25  
E: NH4 = 0.72

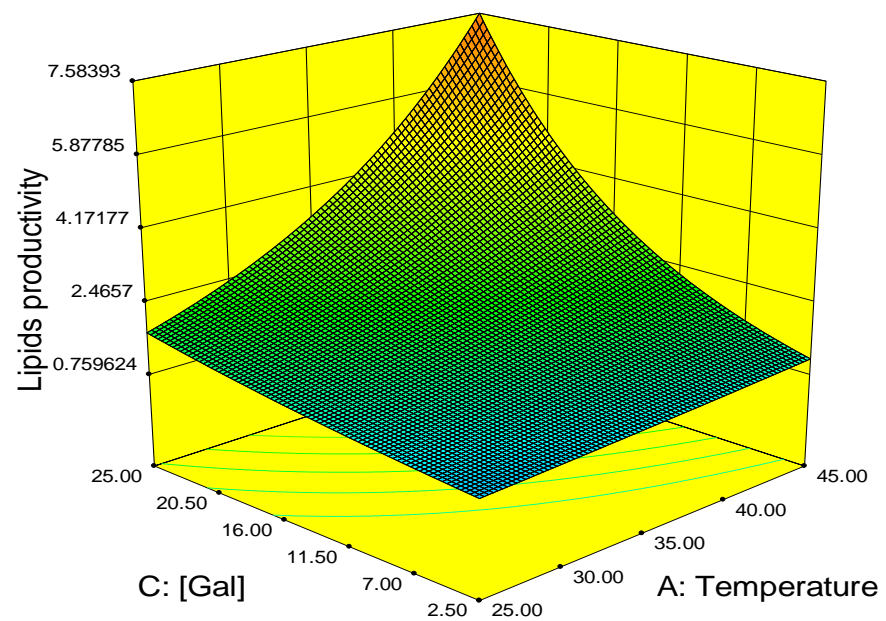

**Figure S2b.** Response surface curve showing the effect of carbon concentration and temperature over total lipid productivity of *Galdieria* sp. USBA-GBX-832

Design-Expert® Software

Factor Coding: Actual

Original Scale

%PUFA

51.43

2.02

2.02

X1 = A: Temperature

X2 = B: pH

Actual Factors

C: [Gal] = 13.75

D: Y.E = 0.25

E: NH4 = 0.72

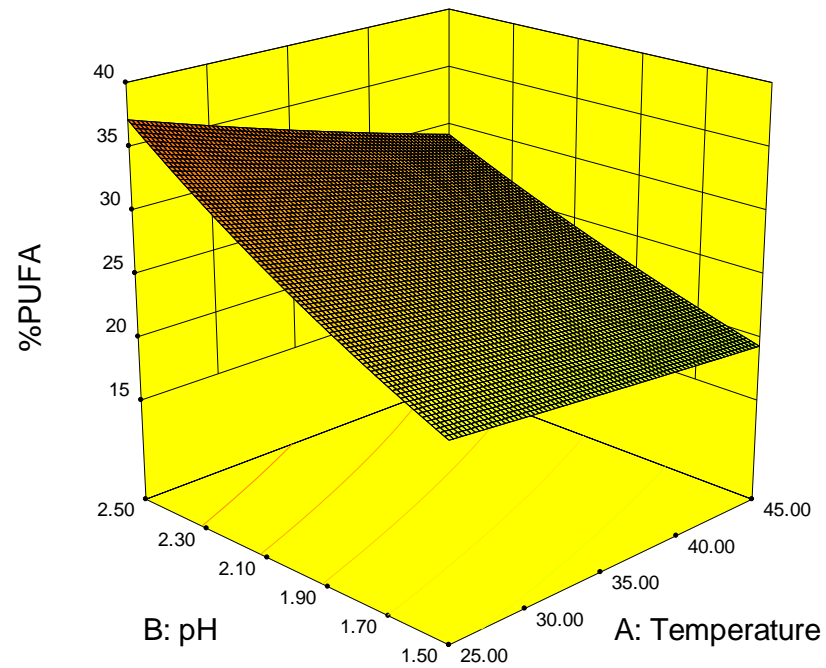

**Figure S2c.** Response surface curve showing the effect of pH and temperature over percentage of polyunsaturated fatty acid productivity (PUFA) of *Galdieria* sp. USBA-GBX-832

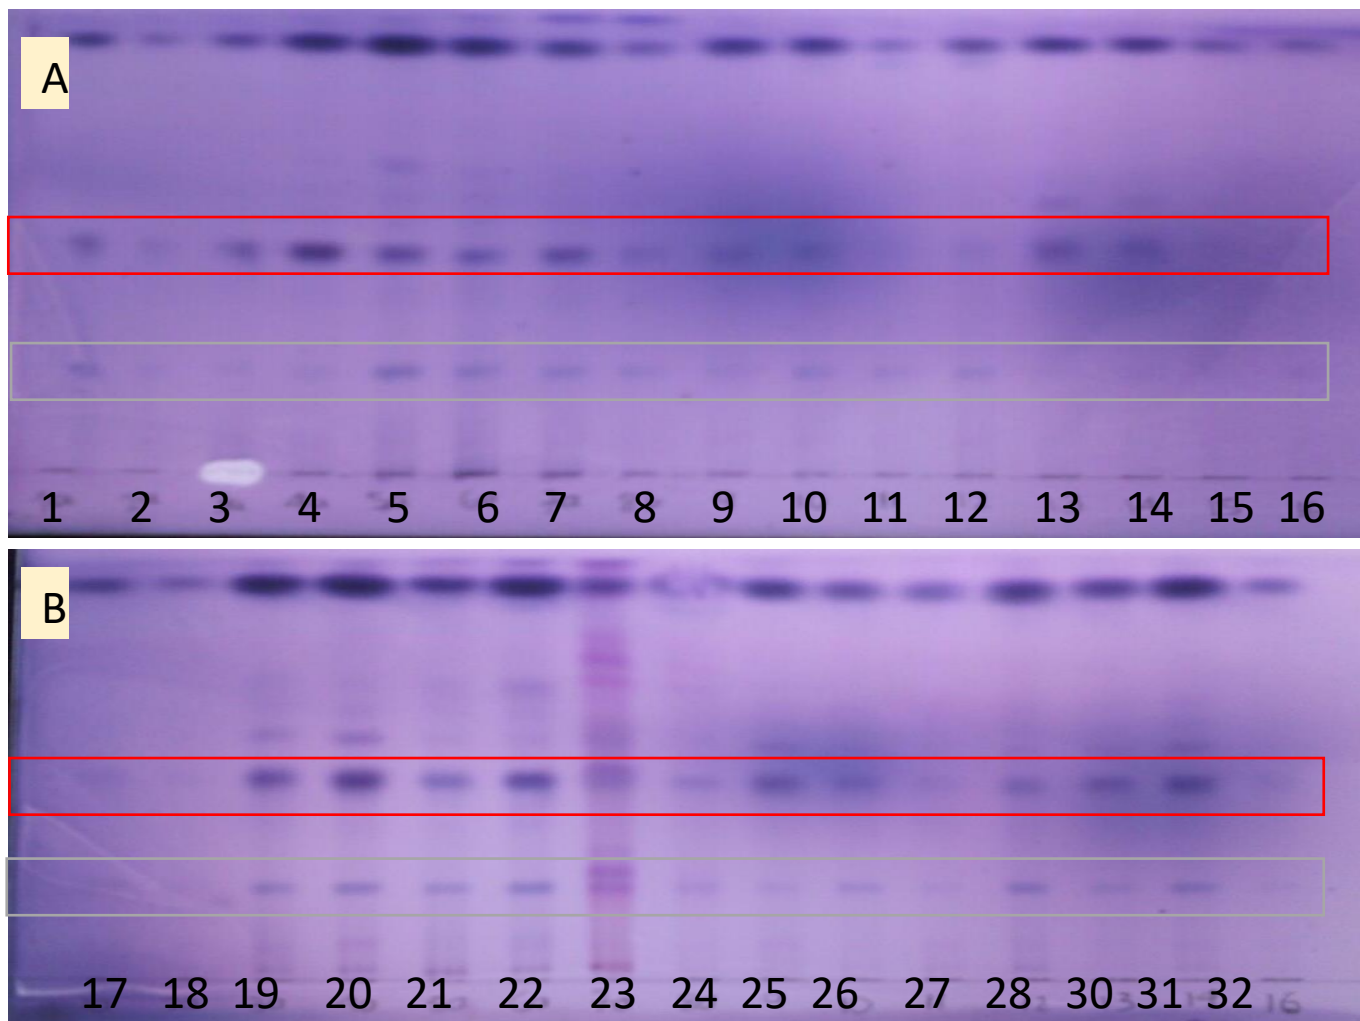

**Figure S3.** Evaluation of neutral lipids through TLC plates. A) treatments at 45 ° C and B) treatments at 25 ° C. Solvents hexane: ethyl acetate (7: 3). Revealed with *p*-anisaldehyde. The red boxes show the position of triacylglycerides (C<sub>16:0</sub>) and the gray boxes the position of free fatty acids.
